# Supplementary material for: Genome-wide Identification, Classification, and Expression Analysis of the Receptor-Like Protein Family in Tomato
Source: PubMed Central journal article supplement — Plant Pathol J. 2018 Oct 1;34(5):435–44. doi: 10.5423/PPJ.OA.02.2018.0032 (PMC6200040; doi:10.5423/ppj.oa.02.2018.0032), 2018-10-01
Supplement: ppj-34-435_suppl.pdf [file ppj-34-435_suppl.pdf]

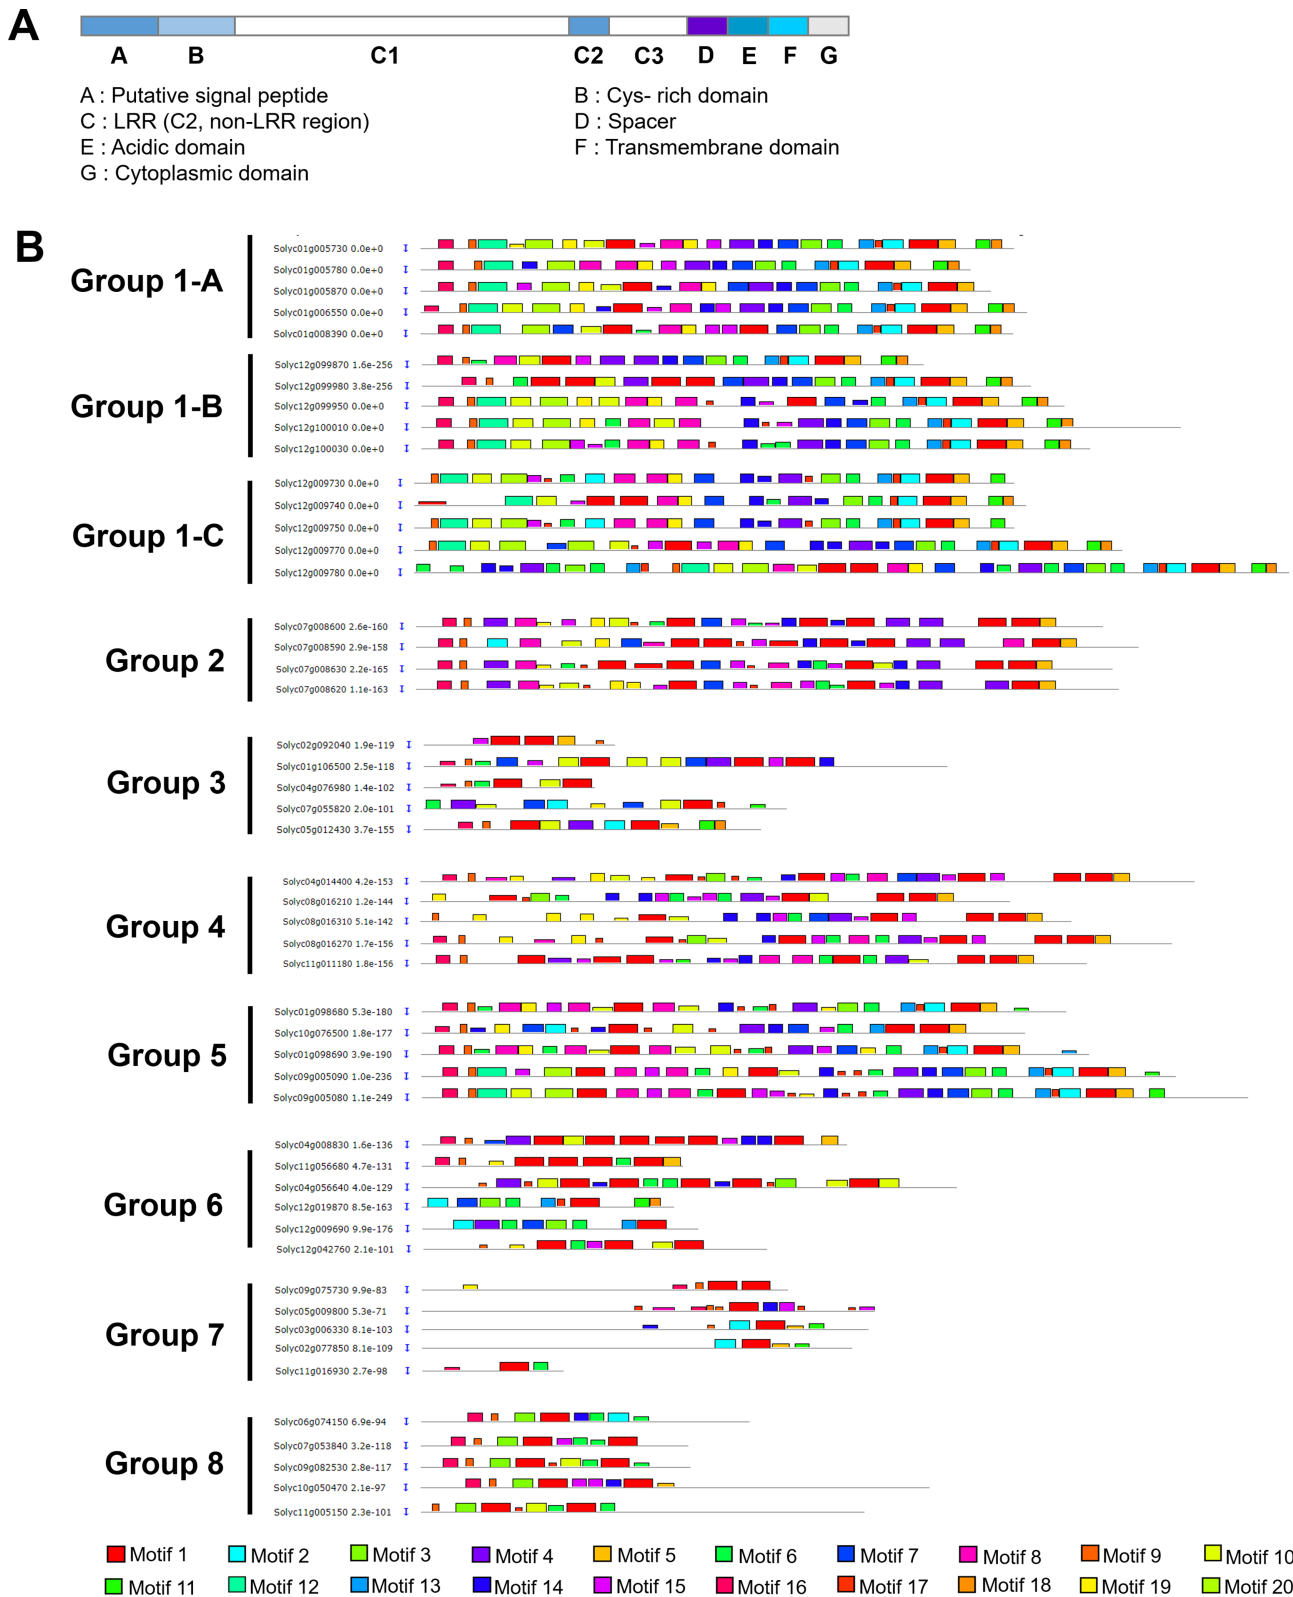

**Supplementary Fig. 1.** Domain structure and conserved motif analysis of tomato RLPs. (A) Schematic diagram of domain structure of Cf-9-like RLP. (B) Conserved motif analysis of SIRLPs. The conserved motifs analysis of tomato RLPs was performed using MEME program and arranged corresponding groups based on phylogenetic tree. Motif 1 to 5 represent corresponding C3 and D domains in supplementary Fig. 1A. Each color indicate each motif.
